# Supplementary material for: Molecular docking studies and 2D analyses of DPP-4 inhibitors as candidates in the treatment of diabetes
Source: Royal Society of Chemistry journal article supplement (doi:10.1039/c5mb00493d), 2015-09-07
Supplement: c5mb00493d1.pdf [file c5mb00493d1.pdf]

**SUPPLEMENTARY MATERIAL**

**Supplementary Table 1.** Structures and IC<sub>50</sub> values for the compound set

| <b>Structure A</b>                                                                   |                             |                                                   |                      |
|--------------------------------------------------------------------------------------|-----------------------------|---------------------------------------------------|----------------------|
| 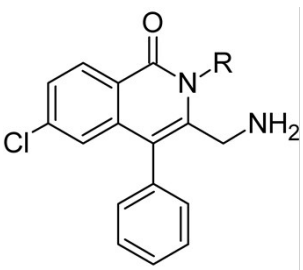    |                             |                                                   |                      |
| <b>Compound</b>                                                                      | <b>IC<sub>50</sub> (nM)</b> | <b>R</b>                                          |                      |
| 1                                                                                    | 8300                        | Et                                                |                      |
| 2                                                                                    | 1600                        | I-Bu                                              |                      |
| <b>Structure B</b>                                                                   |                             |                                                   |                      |
|    |                             |                                                   |                      |
| <b>Compound</b>                                                                      | <b>IC<sub>50</sub> (nM)</b> | <b>R<sub>1</sub></b>                              | <b>R<sub>2</sub></b> |
| 3                                                                                    | 980                         | CO <sub>2</sub> H                                 | H                    |
| 4                                                                                    | 360                         | CONH <sub>2</sub>                                 | H                    |
| 5                                                                                    | 1100                        | CN                                                | H                    |
| 6                                                                                    | 2400                        | H                                                 | CONH <sub>2</sub>    |
| 7                                                                                    | 4000                        | CONMe <sub>2</sub>                                | H                    |
| 8                                                                                    | 870                         | OMe                                               | H                    |
| 9                                                                                    | 240                         | OCH <sub>2</sub> CONH <sub>2</sub>                | H                    |
| 10                                                                                   | 1500                        | CH <sub>2</sub> CH <sub>2</sub> CONH <sub>2</sub> | H                    |
| <b>Structure C</b>                                                                   |                             |                                                   |                      |
|  |                             |                                                   |                      |

| Compound           | IC <sub>50</sub> (nM)                                                             | R                                                                                     |
|--------------------|-----------------------------------------------------------------------------------|---------------------------------------------------------------------------------------|
| 11                 | 34                                                                                | H                                                                                     |
| 12                 | 49                                                                                | 3-F                                                                                   |
| 13                 | 57                                                                                | 3-CH <sub>3</sub>                                                                     |
| 14                 | 4.2                                                                               | 4-CH <sub>3</sub>                                                                     |
| <b>Structure D</b> | 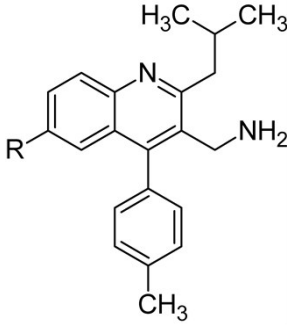 |                                                                                       |
| Compound           | IC <sub>50</sub> (nM)                                                             | R                                                                                     |
| 15                 | 84                                                                                | OCH <sub>2</sub> CO <sub>2</sub> CH <sub>3</sub>                                      |
| 16                 | 52                                                                                | OCH <sub>2</sub> CONHCH <sub>3</sub>                                                  |
| 17                 | 7.5                                                                               | CH <sub>2</sub> CH <sub>2</sub> CONH <sub>2</sub>                                     |
| 18                 | 1.8                                                                               | (E)CH=CHCOCH <sub>2</sub> CO <sub>2</sub>                                             |
| 19                 | 55                                                                                | CONH <sub>2</sub>                                                                     |
| 20                 | 100                                                                               | CO <sub>2</sub> H                                                                     |
| 21                 | 9.2                                                                               |  |
| 22                 | 11                                                                                |   |
| 23                 | 2.2                                                                               |  |
| 24                 | 2.7                                                                               |  |
| 25                 | 1.3                                                                               |  |

| Structure E |                       |   |
|-------------|-----------------------|---|
|             |                       |   |
| Compound    | IC <sub>50</sub> (nM) | R |
| 26          | 69                    |   |
| 27          | 17                    |   |
| 28          | 73                    |   |
| Structure F |                       |   |
|             |                       |   |
| Compound    | IC <sub>50</sub> (nM) | R |
| 29          | 3.7                   |   |
| 30          | 19                    |   |
| 31          | 8.1                   |   |

|                                                                                     |                             |                                                                                      |
|-------------------------------------------------------------------------------------|-----------------------------|--------------------------------------------------------------------------------------|
| 32                                                                                  | 1.8                         | 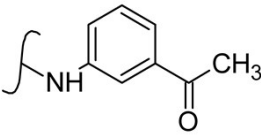   |
| 33                                                                                  | 19                          |    |
| 34                                                                                  | 23                          |    |
| 35                                                                                  | 30                          |    |
| 36                                                                                  | 2.8                         |   |
| 37                                                                                  | 8.2                         |  |
| <b>Structure G</b>                                                                  |                             |                                                                                      |
|  |                             |                                                                                      |
| <b>Compound</b>                                                                     | <b>IC<sub>50</sub> (nM)</b> | <b>R</b>                                                                             |
| 38                                                                                  | 11                          |  |
| 39                                                                                  | 53                          |  |

|                                                                                     |                             |                                                                                     |
|-------------------------------------------------------------------------------------|-----------------------------|-------------------------------------------------------------------------------------|
| 40                                                                                  | 1.1                         | 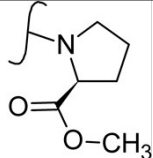 |
| 41                                                                                  | 2.9                         |  |
| 42                                                                                  | 1.1                         |  |
| <b>Structure H</b>                                                                  |                             |                                                                                     |
|   |                             |                                                                                     |
| <b>Compound</b>                                                                     | <b>IC<sub>50</sub> (nM)</b> | <b>n</b>                                                                            |
| 43                                                                                  | 23                          | 2                                                                                   |
| 44                                                                                  | 8.7                         | 3                                                                                   |
| 45                                                                                  | 9.6                         | 4                                                                                   |
| 46                                                                                  | 6.6                         | 5                                                                                   |
| <b>Structure I</b>                                                                  |                             |                                                                                     |
|  |                             |                                                                                     |
| <b>Compound</b>                                                                     | <b>IC<sub>50</sub> (nM)</b> | <b>R</b>                                                                            |
| 47                                                                                  | 18                          | COOH                                                                                |
| 48                                                                                  | 20                          | CH <sub>2</sub> COOH                                                                |

|                    |                                                                                     |                                                                                    |
|--------------------|-------------------------------------------------------------------------------------|------------------------------------------------------------------------------------|
| 49                 | 39                                                                                  | CH <sub>2</sub> CH <sub>2</sub> COOH                                               |
| 50                 | 66                                                                                  | 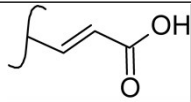 |
| <b>Structure J</b> |    |                                                                                    |
| <b>Compound</b>    | <b>IC<sub>50</sub> (nM)</b>                                                         | <b>R</b>                                                                           |
| 51                 | 57                                                                                  | Pr                                                                                 |
| 52                 | 58                                                                                  | Bu                                                                                 |
| 53                 | 18                                                                                  | Neopentil                                                                          |
| <b>Structure K</b> |  |                                                                                    |
| <b>Compound</b>    | <b>IC<sub>50</sub> (nM)</b>                                                         | <b>R</b>                                                                           |
| 54                 | 5.7                                                                                 | Et                                                                                 |
| 55                 | 4.4                                                                                 | Pr                                                                                 |
| 56                 | 19                                                                                  | i-Pr                                                                               |
| 57                 | 4.6                                                                                 | i-Bu                                                                               |
| 58                 | 2.5                                                                                 | Bn                                                                                 |

**Structure L**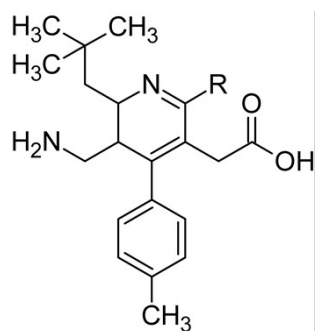

| Compound | IC <sub>50</sub> (nM) | R  |
|----------|-----------------------|----|
| 59       | 10                    | Me |
| 60       | 5.3                   | Et |

**Supplementary Table 2.** RMSD values obtained from the redocking validation employing five different docking protocols

| <b>Protocol</b> | <b>Flexible sidechain residues</b> | <b>Presence of structural water</b> | <b>Redocking – RMSD</b> |
|-----------------|------------------------------------|-------------------------------------|-------------------------|
| 1               | Tyr547, Ser630 and Tyr666          | H <sub>2</sub> O 1 and 2            | 0.657 Å                 |
| 2               | Tyr547, and Tyr666                 | H <sub>2</sub> O 1 and 2            | 2.260 Å                 |
| 3               | Ser630 and Tyr666                  | H <sub>2</sub> O 1 and 2            | 0.733 Å                 |
| 4               | Tyr547, Ser630 and Tyr666          | No structural water                 | 2.262 Å                 |
| 5               | No flexibility                     | No structural water                 | 4.603 Å                 |



**Supplementary Table 3.** Compounds of the test set in each training/test splitting employed in the chance correlation validation

| <b>training / test<br/>set splitting</b> | <b>Compound</b> |           |           |           |           |           |           |           |           |           |           |           |
|------------------------------------------|-----------------|-----------|-----------|-----------|-----------|-----------|-----------|-----------|-----------|-----------|-----------|-----------|
| <b>1*</b>                                | <b>10</b>       | <b>15</b> | <b>17</b> | <b>20</b> | <b>23</b> | <b>28</b> | <b>29</b> | <b>35</b> | <b>38</b> | <b>51</b> | <b>58</b> | <b>60</b> |
| 2                                        | 3               | 8         | 16        | 19        | 22        | 37        | 42        | 45        | 46        | 47        | 50        | 57        |
| 3                                        | 3               | 11        | 18        | 20        | 21        | 25        | 30        | 38        | 40        | 53        | 57        | 59        |
| 4                                        | 1               | 12        | 14        | 18        | 20        | 25        | 35        | 38        | 44        | 48        | 51        | 58        |
| 5                                        | 1               | 18        | 20        | 25        | 31        | 39        | 43        | 47        | 52        | 54        | 58        | 59        |
| 6                                        | 2               | 8         | 25        | 26        | 32        | 34        | 36        | 37        | 38        | 48        | 51        | 58        |
| 7                                        | 4               | 8         | 11        | 14        | 16        | 23        | 24        | 31        | 44        | 47        | 49        | 56        |
| 8                                        | 4               | 9         | 11        | 12        | 14        | 24        | 33        | 37        | 41        | 44        | 48        | 52        |
| 9                                        | 9               | 10        | 15        | 16        | 17        | 30        | 37        | 43        | 44        | 46        | 53        | 58        |
| 10                                       | 1               | 16        | 20        | 21        | 22        | 23        | 28        | 37        | 42        | 46        | 50        | 52        |
| 11                                       | 6               | 9         | 12        | 14        | 16        | 23        | 29        | 35        | 52        | 53        | 54        | 57        |
| 12                                       | 6               | 16        | 18        | 20        | 28        | 38        | 39        | 44        | 45        | 46        | 54        | 59        |
| 13                                       | 7               | 14        | 20        | 21        | 28        | 30        | 37        | 38        | 41        | 42        | 43        | 49        |
| 14                                       | 6               | 12        | 16        | 20        | 29        | 31        | 36        | 40        | 41        | 43        | 48        | 59        |
| 15                                       | 7               | 20        | 35        | 39        | 40        | 42        | 44        | 52        | 53        | 56        | 58        | 60        |
| 16                                       | 3               | 8         | 11        | 23        | 34        | 36        | 38        | 42        | 43        | 51        | 57        | 60        |
| 17                                       | 4               | 8         | 13        | 15        | 19        | 22        | 24        | 25        | 35        | 42        | 44        | 55        |
| 18                                       | 2               | 9         | 13        | 17        | 18        | 27        | 35        | 40        | 49        | 53        | 57        | 60        |
| 19                                       | 6               | 8         | 11        | 12        | 17        | 30        | 31        | 37        | 41        | 48        | 53        | 58        |
| 20                                       | 5               | 13        | 20        | 22        | 23        | 29        | 36        | 38        | 39        | 45        | 52        | 57        |

\*test compounds employed in the external validation

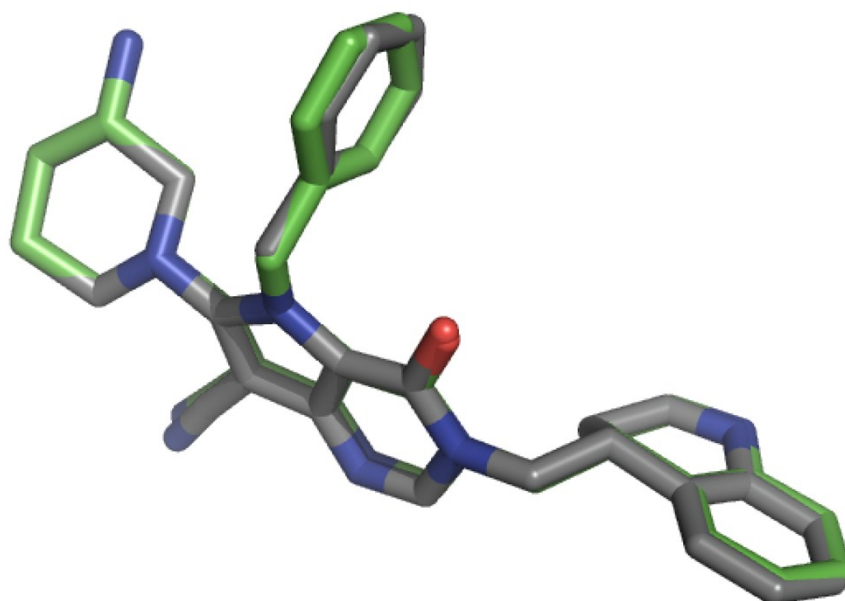

**Supplementary Figure 1.** Redocking pose (carbon atoms showed in gray) of the crystallographic ligand (C atoms in dark green) - PDB: 4A5S - obtained with the best docking protocol.
